# Supplementary material
Source: ML conference proceedings conference paper supplement (https://openaccess.thecvf.com/content/CVPR_2020/html/He_Momentum_Contrast_for_CVPR_2020_paper.html)
Supplement: Supplementary file 1 [file He_Momentum_Contrast_for_CVPR_2020_supplemental.pdf]

## A. Appendix

### A.1. Implementation: Object detection backbones

The R50-dilated-C5 and R50-C4 backbones are similar to those available in `Detectron2` [60]: (i) *R50-dilated-C5*: the backbone includes the ResNet conv<sub>5</sub> stage with a dilation of 2 and stride 1, followed by a 3×3 convolution (with BN) that reduces dimension to 512. The box prediction head consists of two hidden fully-connected layers. (ii) *R50-C4*: the backbone ends with the conv<sub>4</sub> stage, and the box prediction head consists of the conv<sub>5</sub> stage (including global pooling) followed by a BN layer.

### A.2. Implementation: COCO keypoint detection

We use Mask R-CNN (keypoint version) with R50-FPN, implemented in [60], fine-tuned on COCO `train2017` and evaluated on `val2017`. The schedule is 2×.

### A.3. Implementation: COCO dense pose estimation

We use DensePose R-CNN [1] with R50-FPN, implemented in [60], fine-tuned on COCO `train2017` and evaluated on `val2017`. The schedule is “s1×”.

### A.4. Implementation: LVIS instance segmentation

We use Mask R-CNN with R50-FPN, fine-tuned in LVIS [27] `train_v0.5` and evaluated in `val_v0.5`. We follow the baseline in [27] (arXiv v3 Appendix B).

LVIS is a new dataset and model designs on it are to be explored. The following table includes the relevant ablations (all are averages of 5 trials):

| pre-train    | BN     | 1× schedule      |                                |                                | 2× schedule      |                                |                                |
|--------------|--------|------------------|--------------------------------|--------------------------------|------------------|--------------------------------|--------------------------------|
|              |        | AP <sup>mk</sup> | AP <sup>mk</sup> <sub>50</sub> | AP <sup>mk</sup> <sub>75</sub> | AP <sup>mk</sup> | AP <sup>mk</sup> <sub>50</sub> | AP <sup>mk</sup> <sub>75</sub> |
| super. IN-1M | frozen | 24.1             | 37.3                           | 25.4                           | 24.4             | 37.8                           | 25.8                           |
| super. IN-1M | tuned  | 23.5             | 36.6                           | 24.8                           | 23.2             | 36.0                           | 24.4                           |
| MoCo IN-1M   | tuned  | 23.2             | 36.0                           | 24.7                           | 24.1             | 37.4                           | 25.5                           |
| MoCo IG-1B   | tuned  | 24.3             | 37.4                           | 25.9                           | <b>24.9</b>      | <b>38.2</b>                    | <b>26.4</b>                    |

A supervised pre-training baseline, end-to-end tuned but with BN frozen, has 24.4 AP<sup>mk</sup>. But tuning BN in this baseline leads to worse results and overfitting (this is unlike on COCO/VOC where tuning BN gives better or comparable accuracy). MoCo has 24.1 AP<sup>mk</sup> with IN-1M and 24.9 AP<sup>mk</sup> with IG-1B, both outperforming the supervised pre-training counterpart under the same tunable BN setting. Under the best individual settings, MoCo can still outperform the supervised pre-training case (24.9 vs. 24.4, as reported in Table 6 in Sec 4.2).

### A.5. Implementation: Semantic segmentation

We use an FCN-based [43] structure. The backbone consists of the convolutional layers in R50, and the 3×3 convolutions in conv<sub>5</sub> blocks have dilation 2 and stride 1. This is followed by two extra 3×3 convolutions of 256 channels,

with BN and ReLU, and then a 1×1 convolution for per-pixel classification. The total stride is 16 (FCN-16s [43]). We set dilation = 6 in the two extra 3×3 convolutions, following the large field-of-view design in [6].

Training is with random scaling (by a ratio in [0.5, 2.0]), cropping, and horizontal flipping. The crop size is 513 on VOC and 769 on Cityscapes [6]. Inference is performed on the original image size. We train with mini-batch size 16 and weight decay 0.0001. Learning rate is 0.003 on VOC and is 0.01 on Cityscapes (multiplied by 0.1 at 70-th and 90-th percentile of training). For VOC, we train on the `train_aug2012` set (augmented by [30], 10582 images) for 30k iterations, and evaluate on `val2012`. For Cityscapes, we train on the `train_fine` set (2975 images) for 90k iterations, and evaluate on the `val` set. Results are reported as averages over 5 trials.

### A.6. iNaturalist fine-grained classification

In addition to the detection/segmentation experiments in the main paper, we study fine-grained classification on the iNaturalist 2018 dataset [57]. We fine-tune the pre-trained models end-to-end on the `train` set (~437k images, 8142 classes) and evaluate on the `val` set. Training follows the typical ResNet implementation in PyTorch with 100 epochs. Fine-tuning has a learning rate of 0.025 (vs. 0.1 from scratch) decreased by 10 at the 70-th and 90-th percentile of training. The following is the R50 result:

| pre-train    | rand init. | super. <sub>IN-1M</sub> | MoCo <sub>IN-1M</sub> | MoCo <sub>IG-1B</sub> |
|--------------|------------|-------------------------|-----------------------|-----------------------|
| accuracy (%) | 61.8       | <b>66.1</b>             | 65.6                  | 65.8                  |

MoCo is ~4% better than training from random initialization, and is closely comparable with its ImageNet supervised counterpart. This again shows that MoCo unsupervised pre-training is competitive.

### A.7. Fine-tuning in ImageNet

Linear classification on frozen features (Sec. 4.1) is a common protocol of evaluating unsupervised pre-training methods. However, in practice, it is more common to fine-tune the features end-to-end in a downstream task. For completeness, the following table reports end-to-end fine-tuning results for the 1000-class ImageNet classification, compared with training from scratch (fine-tuning uses an initial learning rate of 0.03, vs. 0.1 from scratch):

| pre-train    | random init. | MoCo <sub>IG-1B</sub> |
|--------------|--------------|-----------------------|
| accuracy (%) | 76.5         | <b>77.3</b>           |

As here ImageNet is the downstream task, the case of MoCo pre-trained on IN-1M does not represent a real scenario (for reference, we report that its accuracy is 77.0% after fine-tuning). But unsupervised pre-training in the *separate*, unlabeled dataset of IG-1B represents a typical scenario: in this case, MoCo improves by 0.8%.

| pre-train    | AP <sup>bb</sup> | AP <sub>50</sub> <sup>bb</sup> | AP <sub>75</sub> <sup>bb</sup> | AP <sup>mk</sup> | AP <sub>50</sub> <sup>mk</sup> | AP <sub>75</sub> <sup>mk</sup> | AP <sup>bb</sup> | AP <sub>50</sub> <sup>bb</sup> | AP <sub>75</sub> <sup>bb</sup> | AP <sup>mk</sup> | AP <sub>50</sub> <sup>mk</sup> | AP <sub>75</sub> <sup>mk</sup> |
|--------------|------------------|--------------------------------|--------------------------------|------------------|--------------------------------|--------------------------------|------------------|--------------------------------|--------------------------------|------------------|--------------------------------|--------------------------------|
| random init. | 36.7             | 56.7                           | 40.0                           | 33.7             | 53.8                           | 35.9                           | 41.4             | 61.9                           | 45.1                           | 37.6             | 59.1                           | 40.3                           |
| super. IN-1M | 40.6             | 61.3                           | 44.4                           | 36.8             | 58.1                           | 39.5                           | 41.9             | 62.5                           | 45.6                           | 38.0             | 59.6                           | 40.8                           |
| MoCo IN-1M   | 40.8 (+0.2)      | 61.6 (+0.3)                    | 44.7 (+0.3)                    | 36.9 (+0.1)      | 58.4 (+0.3)                    | 39.7 (+0.2)                    | 42.3 (+0.4)      | 62.7 (+0.2)                    | 46.2 (+0.6)                    | 38.3 (+0.3)      | 60.1 (+0.5)                    | 41.2 (+0.4)                    |
| MoCo IG-1B   | 41.1 (+0.5)      | 61.8 (+0.5)                    | 45.1 (+0.7)                    | 37.4 (+0.6)      | 59.1 (+1.0)                    | 40.2 (+0.7)                    | 42.8 (+0.9)      | 63.2 (+0.7)                    | 47.0 (+1.4)                    | 38.7 (+0.7)      | 60.5 (+0.9)                    | 41.3 (+0.5)                    |

(a) Mask R-CNN, R50-FPN, 2× schedule

(b) Mask R-CNN, R50-FPN, 6× schedule

Table A.1. Object detection and instance segmentation fine-tuned on COCO: 2× vs. 6× schedule. In the brackets are the gaps to the ImageNet supervised pre-training counterpart. In green are the gaps of at least +0.5 point.

## A.8. COCO longer fine-tuning

In Table 5 we reported results of the 1× (~12 epochs) and 2× schedules on COCO. These schedules were inherited from the original Mask R-CNN paper [32], which could be suboptimal given later advance in the field. In Table A.1, we supplement the results of a 6× schedule (~72 epochs) [31] and compare with those of the 2× schedule.

We observe: (i) fine-tuning with ImageNet-supervised pre-training still has improvements (41.9 AP<sup>bb</sup>); (ii) training from scratch largely catches up (41.4 AP<sup>bb</sup>); (iii) the MoCo counterparts improve further (e.g., to 42.8 AP<sup>bb</sup>) and have larger gaps (e.g., +0.9 AP<sup>bb</sup> with 6×, vs. +0.5 AP<sup>bb</sup> with 2×). Table A.1 and Table 5 suggest that the MoCo pre-trained features can have *larger* advantages than the ImageNet-supervised features when fine-tuning *longer*.

## A.9. Ablation on Shuffling BN

Figure A.1 provides the training curves of MoCo with or without shuffling BN: removing shuffling BN shows obvious overfitting to the pretext task: training accuracy of the pretext task (dash curve) quickly increases to >99.9%, and the kNN-based validation classification accuracy (solid curve) drops soon. This is observed for both the MoCo and end-to-end variants; the memory bank variant implicitly has different statistics for  $q$  and  $k$ , so avoids this issue.

These experiments suggest that without shuffling BN, the sub-batch statistics can serve as a “signature” to tell which sub-batch the positive key is in. Shuffling BN can remove this signature and avoid such cheating.

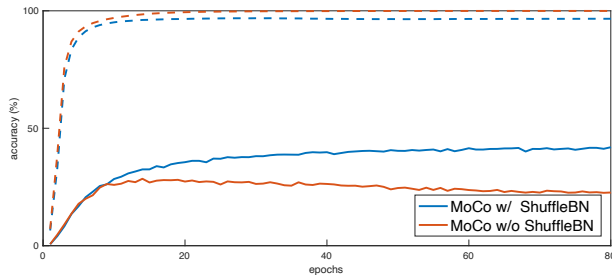

Figure A.1. **Ablation of Shuffling BN.** *Dash*: training curve of the pretext task, plotted as the accuracy of  $(K+1)$ -way dictionary lookup. *Solid*: validation curve of a kNN-based monitor [61] (not a linear classifier) on ImageNet classification accuracy. This plot shows the first 80 epochs of training: training longer without shuffling BN overfits more.
